# Supplementary material
Source: Research Square preprint supplement (doi:10.21203/rs.3.rs-9735529/v1)
Supplement: Supplementary file 1 [file QICT_supplementary_information.pdf › All supplement /supplement/QICT_supplementary_information.pdf]

# Supplementary derivations, benchmark policy, Milky Way gas-stress calculation, and claim audit

Mohamed Sacha  
ORCID: 0009-0005-2078-2032  
Independent Researcher  
Casablanca, Morocco

16 May 2026

## 1 Purpose and notation

This supplement gives the derivations and numerical policy used in the main text. The residual field is defined after the baryonic circular-speed contribution has been constructed,

$$V_b^2(R) = V_{\text{gas}}^2(R) + V_{\text{disk}}^2(R) + V_{\text{bulge}}^2(R), \quad (1)$$

and the residual acceleration is

$$g_I(R) = \frac{V_{\text{obs}}^2(R) - V_b^2(R)}{R}. \quad (2)$$

All benchmark models are evaluated against the same observed velocity vector and the same covariance prescription.

## 2 Axisymmetric finite-correlation response

Let the residual-field source be

$$\mathcal{J}_I(R) = \frac{2V_0^2}{\ell^2} \exp(-R^2/\ell^2). \quad (3)$$

The residual potential obeys

$$\frac{1}{R} \frac{d}{dR} \left( R \frac{d\Phi_I}{dR} \right) = \mathcal{J}_I(R). \quad (4)$$

Multiplying by  $R$  and integrating from zero to  $R$  gives

$$R \frac{d\Phi_I}{dR} = \int_0^R R' \mathcal{J}_I(R') dR' = V_0^2 [1 - \exp(-R^2/\ell^2)]. \quad (5)$$

The residual circular-speed contribution is therefore

$$V_I^2(R) = R \frac{d\Phi_I}{dR} = V_0^2 [1 - \exp(-R^2/\ell^2)]. \quad (6)$$

The origin is regular,  $V_I^2 \propto R^2$ , and the large-radius limit is finite,  $V_I^2 \rightarrow V_0^2$ .

### 3 Least-informative source under finite moment constraints

Consider positive axisymmetric source densities with fixed normalization and fixed second moment,

$$\int_0^\infty 2\pi R \mathcal{J}(R) dR = J_0, \quad \int_0^\infty 2\pi R^3 \mathcal{J}(R) dR = J_2. \quad (7)$$

The entropy functional

$$S = - \int_0^\infty 2\pi R \mathcal{J} \ln \mathcal{J} dR \quad (8)$$

has stationary variation

$$\delta \left[ S - \lambda_0 \int 2\pi R \mathcal{J} dR - \lambda_2 \int 2\pi R^3 \mathcal{J} dR \right] = 0. \quad (9)$$

Thus

$$\ln \mathcal{J} + 1 + \lambda_0 + \lambda_2 R^2 = 0, \quad (10)$$

and

$$\mathcal{J}(R) = A \exp(-R^2/\ell^2). \quad (11)$$

This establishes the Gaussian as the least-informative finite-correlation source under the two stated constraints. It does not determine the physical value of  $\ell$ ; that value is fixed by the H I action closure.

### 4 Height-integrated H I dynamics

The starting point is the height-integrated gas system

$$\partial_t \Sigma + \nabla \cdot (\Sigma \mathbf{u}) = 0, \quad (12)$$

$$\Sigma(\partial_t \mathbf{u} + \mathbf{u} \cdot \nabla \mathbf{u} + 2\mathbf{\Omega} \times \mathbf{u}) = -\nabla(\Sigma \sigma^2) - \Sigma \nabla(\Phi_b + \Phi_I). \quad (13)$$

Linear perturbations of a rotating disk lead to a stability structure governed by epicyclic frequency, surface density, and velocity dispersion. The Toomre form  $Q = \sigma\kappa/(\pi G\Sigma)$  gives the local stability scale for gas-like perturbations, while the finite thickness and turbulent pressure smooth unresolved modes [1–3]. For the closure used here, the positive action measure is taken as

$$d\mu_A = \Sigma \sigma^2 dA, \quad (14)$$

which is the observable turbulent-pressure action carried by the H I layer. This measure is directly testable from moment-zero and moment-two maps.

### 5 Helmholtz decomposition and action reservoirs

The in-plane displacement field is decomposed as

$$\boldsymbol{\xi} = \nabla \chi + \hat{\mathbf{z}} \times \nabla \eta. \quad (15)$$

The first term is compressive and changes local surface density; the second is solenoidal and preserves area to first order. A finite-correlation separation assigns each sector to coherent and diffuse reservoirs. The four reservoirs are

$$\{C_{\text{comp}}, C_{\text{sol}}, D_{\text{comp}}, D_{\text{sol}}\}. \quad (16)$$

With only the total unresolved action specified and no preferred reservoir before radial projection, the constrained entropy

$$S_4 = - \sum_{j=1}^4 p_j \ln p_j + \lambda \left( \sum_{j=1}^4 p_j - 1 \right) \quad (17)$$

is stationary at

$$p_j = \frac{1}{4}. \quad (18)$$

The radial residual field is assigned to the coherent-compressive reservoir because that sector is the only reservoir that simultaneously changes surface density and remains phase coherent over a finite radial scale.

**Proposition 1** (conditional H I action-quartile closure). *Under the assumptions of a positive H I turbulent-action measure, Helmholtz-sector orthogonality, finite-correlation separation, and equal unresolved reservoir weights before radial projection, the residual-field correlation length is the radius enclosing one quarter of the total H I turbulent action:*

$$\int_{r \leq \ell_I} \Sigma \sigma^2 dA = \frac{1}{4} \int \Sigma \sigma^2 dA. \quad (19)$$

If  $\sigma^2 = \bar{\sigma}^2(1 + \epsilon h)$  with  $|\epsilon h| \ll 1$ , then  $\ell_I = R_{25}^{\text{HI}} + O(\epsilon)$ .

Proof. The four-reservoir maximum-entropy stationary point gives  $p_j = 1/4$ . Coupling the radial residual response to the coherent-compressive reservoir selects one of the four reservoirs. The corresponding radial action radius is the radius enclosing one quarter of the H I action. If the dispersion field is slowly varying, the action cumulative is a smooth perturbation of the flux cumulative. The implicit-function theorem then gives a first-order displacement of the quartile radius proportional to the dispersion perturbation amplitude.  $\square$

## 6 Tail sensitivity of quartiles

Let  $F(R)$  be a cumulative H I measure and  $R_q$  satisfy  $F(R_q) = qF(\infty)$ . Perturb the outer tail by  $\epsilon G$  with  $G(R) = 0$  for  $R < R_t$  and  $R_q < R_t$ . The first-order quantile displacement is

$$\delta R_q = \frac{q\delta F(\infty) - \delta F(R_q)}{F'(R_q)} = \frac{q\delta F(\infty)}{F'(R_q)}. \quad (20)$$

Outer-tail sensitivity is proportional to  $q$  for inner quantiles. The first quartile is therefore less sensitive to diffuse H I tails than the median or upper quartile, while remaining outside the beam-dominated central region in the resolved DDO154 map.

Table 1: DDO154 H I flux and action-proxy quartiles.

| Measure                                      | $R_{25}$ | $R_{50}$ | $R_{75}$ | $R_{25}/R_{25}^{\text{flux}}$ |
|----------------------------------------------|----------|----------|----------|-------------------------------|
| H I flux measure                             | 2.638    | 5.472    | 9.177    | 1.000                         |
| H I turbulent action proxy: $\Sigma\sigma$   | 2.480    | 5.179    | 8.823    | 0.940                         |
| H I turbulent action proxy: $\Sigma\sigma^2$ | 2.366    | 4.938    | 8.538    | 0.897                         |

## 7 Amplitude closure and acceleration-scale comparison

The acceleration scale is

$$a_H = \frac{cH_0}{2\pi} = 1.082 \times 10^{-10} \text{ m s}^{-2}. \quad (21)$$

It is close to the MOND/RAR acceleration scale [4–6]. The amplitude law

$$V_c^4 = GMa_H \quad (22)$$

therefore shares the baryonic Tully-Fisher scaling. The new test is not the scaling alone; it is the combination of this amplitude with a map-derived finite-correlation length.

Two masses are distinguished:

$$V_{c,\text{gas}}^4 = GM_{\text{gas}}a_H, \quad (23)$$

$$V_{c,\text{bar}}^4 = G(M_{\text{gas}} + M_\star)a_H. \quad (24)$$

The gas-only mass is suitable for a gas-dominated target such as DDO154. Stellar-dominated disks require the baryon-complete diagnostic.

Table 2: Amplitude diagnostics by target.

| Galaxy  | class            | $M_{\text{gas}}$<br>$M_\odot$ | $M_\star$<br>$M_\odot$ | $V_{c,\text{gas}}$<br>$\text{km s}^{-1}$ | $V_{c,\text{bar}}$<br>$\text{km s}^{-1}$ | $V_{I,\text{diag}}$<br>$\text{km s}^{-1}$ |
|---------|------------------|-------------------------------|------------------------|------------------------------------------|------------------------------------------|-------------------------------------------|
| DDO154  | map-level        | $3.62 \times 10^8$            | –                      | 47.7                                     | 47.7                                     | 44.4                                      |
| NGC3198 | radial auxiliary | $7.07 \times 10^9$            | $1.69 \times 10^{10}$  | 100.4                                    | 136.3                                    | 90.8                                      |
| NGC7331 | radial auxiliary | $6.93 \times 10^9$            | $4.59 \times 10^{10}$  | 99.9                                     | 166.0                                    | 0.0                                       |

## 8 Radial covariance and nuisance marginalization

For a velocity residual vector  $\Delta_i = V_{\text{obs},i} - V_{\text{mod},i}$ , the likelihood is

$$\ln \mathcal{L} = -\frac{1}{2} \Delta^T C^{-1} \Delta - \frac{1}{2} \ln |C| - \frac{n}{2} \ln(2\pi), \quad (25)$$

with

$$C_{ij} = (1 - \rho) \sigma_i^2 \delta_{ij} + \rho \sigma_i \sigma_j \exp(-|R_i - R_j|/L_c). \quad (26)$$

The nuisance vector is

$$\theta_n = (s_D, s_i, \Upsilon_\star, \rho, L_c, b), \quad (27)$$

representing distance, inclination-induced velocity normalization, stellar mass-to-light ratio, radial covariance, covariance length, and beam smearing. The same nuisance policy is used for QICT, NFW, Burkert, pseudo-isothermal, Einasto, and DC14-like families.

## 9 Halo benchmarks

The NFW model includes a weak concentration-mass prior. Einasto is evaluated with fixed shape parameter  $\alpha = 0.18$  and fitted amplitude and scale radius. The DC14-like model uses a fixed feedback-modified core-cusp transition. Burkert and pseudo-isothermal profiles test cored halo shapes. These profiles are benchmark families evaluated under the same nuisance, covariance, and beam-smearing policy.

Table 3: Homogeneous nuisance marginalization summary.

| galaxy  | model                     | logZ  | chi2_median | chi2_p16 | chi2_p84 |
|---------|---------------------------|-------|-------------|----------|----------|
| DDO154  | QICT anchored             | -21.2 | 5.4         | 2.98     | 10.7     |
| DDO154  | QICT posterior diagnostic | -21.3 | 5.56        | 3.16     | 12.2     |
| DDO154  | NFW c-M prior             | -61.2 | 106         | 94.5     | 118      |
| DDO154  | Burkert                   | -22.7 | 8.91        | 5.79     | 14.2     |
| NGC3198 | QICT anchored             | -210  | 591         | 388      | 783      |
| NGC3198 | QICT posterior diagnostic | -126  | 29.6        | 20.2     | 45.8     |
| NGC3198 | NFW c-M prior             | -121  | 15.1        | 7.52     | 39.4     |
| NGC3198 | Burkert                   | -132  | 41.7        | 33       | 60       |
| NGC7331 | QICT anchored             | -321  | 1.65e+03    | 1e+03    | 2.36e+03 |
| NGC7331 | QICT posterior diagnostic | -127  | 37.1        | 17.7     | 87.7     |
| NGC7331 | NFW c-M prior             | -145  | 104         | 64.7     | 220      |
| NGC7331 | Burkert                   | -180  | 160         | 136      | 273      |

## 10 Milky Way gas-stress radial solver

The Milky Way ledger adds a component-resolved radial stress calculation. The active input files are `mw_radial_components.csv`, `mw_stress_components.csv`, `mw_rotation_curve.csv`, `mw_vertical_force_Kz.csv`, `mw_oort_constants.csv`, `mw_solar_geometry.json`, and `sgrA_prior.json`. The scoring curve is not used to build the response basis; it is used to estimate the non-negative channel amplitudes and to compute the benchmark metrics.

The component stress tensor has the schematic form

$$\Pi_b^{ij} = \sum_a \rho_a (\sigma_a^{ij} + \delta u_a^i \delta u_a^j + c_{s,a}^2 h^{ij}) + P_{fb} h^{ij}, \quad (28)$$

with source acceleration

$$a_{\Pi}^i = (\rho_b + \epsilon)^{-1} \nabla_j \Pi_b^{ij}. \quad (29)$$

The radial implementation does not reconstruct the full tensor divergence; it evaluates a compact response basis:

$$B_1(R) = V_b^2(R), \quad (30)$$

$$B_2(R) = [\mathcal{G}_{H_2} V_{H_2}^2](R), \quad (31)$$

$$B_3(R) = V_0^2 \frac{R}{R + R_0/4}. \quad (32)$$

The molecular Green response uses the  $H_2$  cumulative profile to define a compact molecular memory scale. The historical disk channel uses  $R_0/4$  as a fixed coherence radius set by the Solar-geometry file. The black-hole copy-time gate uses the Sgr A\* prior and is retained in the equations, but it is negligible on the supplied radial grid.

Let  $X$  be the matrix with columns  $B_1$ ,  $B_2$ , and  $B_3$ , and let  $y = V_{obs}^2$ . With velocity errors  $\sigma_V$ , the variance in  $y$  is approximated as  $\sigma_y = 2V_{obs}\sigma_V$ . The response coefficients are obtained by

$$\hat{c} = \arg \min_{c \geq 0} \left\| \frac{Xc - y}{\sigma_y} \right\|_2^2. \quad (33)$$

The predicted circular speed is

$$V_{QICT}(R) = \sqrt{X(R)\hat{c}}. \quad (34)$$

The active coefficients are counted in AIC and BIC. Halo baselines are fitted on the same radial grid and the same velocity errors.

Table 4: Extended model comparison.

| galaxy  | model                     | BIC     | RMS_kms | chi2    |
|---------|---------------------------|---------|---------|---------|
| DDO154  | Baryons only              | 824     | 22.7    | 824     |
| DDO154  | RAR fixed a0              | 81.7    | 6.74    | 81.7    |
| DDO154  | QICT anchored             | 2.21    | 0.839   | 2.21    |
| DDO154  | QICT posterior diagnostic | 7.1     | 0.835   | 2.13    |
| DDO154  | NFW c-M prior             | 104     | 6.94    | 98.9    |
| DDO154  | Burkert                   | 9.94    | 1.36    | 4.97    |
| DDO154  | Pseudo-isothermal         | 11.4    | 1.54    | 6.41    |
| DDO154  | Einasto alpha=0.18        | 23      | 2.64    | 18      |
| DDO154  | DC14-like core-cusp       | 12.8    | 1.74    | 7.81    |
| NGC3198 | Baryons only              | 553     | 40.8    | 553     |
| NGC3198 | RAR fixed a0              | 404     | 31.8    | 404     |
| NGC3198 | QICT anchored             | 553     | 40.8    | 553     |
| NGC3198 | QICT posterior diagnostic | 28      | 4.41    | 20.2    |
| NGC3198 | NFW c-M prior             | 16.1    | 3.98    | 8.32    |
| NGC3198 | Burkert                   | 40.7    | 5.68    | 32.9    |
| NGC3198 | Pseudo-isothermal         | 10.2    | 1.57    | 2.34    |
| NGC3198 | Einasto alpha=0.18        | 9.35    | 1.38    | 1.53    |
| NGC3198 | DC14-like core-cusp       | 39.3    | 5.68    | 31.5    |
| NGC7331 | Baryons only              | 1.6e+03 | 69.2    | 1.6e+03 |
| NGC7331 | RAR fixed a0              | 296     | 24.5    | 296     |
| NGC7331 | QICT anchored             | 1.6e+03 | 69.2    | 1.6e+03 |
| NGC7331 | QICT posterior diagnostic | 22.5    | 4.28    | 14.6    |
| NGC7331 | NFW c-M prior             | 92.1    | 10.6    | 84.3    |
| NGC7331 | Burkert                   | 155     | 11.8    | 147     |
| NGC7331 | Pseudo-isothermal         | 8.58    | 1.09    | 0.756   |
| NGC7331 | Einasto alpha=0.18        | 31.1    | 5.06    | 23.3    |
| NGC7331 | DC14-like core-cusp       | 159     | 11.9    | 151     |

The result is a component-resolved radial stress calculation. It is not an external-galaxy H I map-level validation and is therefore reported as a separate evidence class.

## 11 Map-level audit and ring-level stress test

The audit script requires a two-dimensional H I moment-zero FITS map for map-level status. A rotation curve, baryonic decomposition, or gas radial profile receives radial or ring-level status. The submitted files yield one map-level target, DDO154. NGC3198 and NGC7331 are radial auxiliary targets. The late-type archive is a ring-level stress test.

The ring-level analogue of the H I quartile is

$$\ell_{25}^{\text{gas}} = Q_{0.25}(R; w), \quad w(R) = \max[V_{\text{gas}}(R)|V_{\text{gas}}(R)|, 0]R\Delta R. \quad (35)$$

The retained sample contains 143 galaxies. The median ratio  $\ell_{\text{post}}/\ell_{25}^{\text{gas}}$  is 0.583, and the anchored ring-level model beats the best halo benchmark in 27 galaxies. The result is a quantified population-level tension under a ring-level stress test.

## 12 Claim-status matrix

The analysis establishes a strict map-level result for DDO154. NGC3198, NGC7331, and the late-type ring-level sample retain radial or ring-level status because the submitted files lack the required H I

Table 5: Milky Way gas-stress model metrics.

| Model                   | $\chi^2$ | $\chi^2/N$ | AIC      | BIC      |
|-------------------------|----------|------------|----------|----------|
| baryons only            | 18309.02 | 183.090    | 18309.02 | 18309.02 |
| QICT gas-stress closure | 149.24   | 1.492      | 155.24   | 163.05   |
| Burkert + baryons       | 1464.51  | 14.645     | 1468.51  | 1473.72  |
| NFW + baryons           | 1860.39  | 18.604     | 1864.39  | 1869.60  |

Table 6: Milky Way QICT channel amplitudes.

| Response channel            | Coefficient |
|-----------------------------|-------------|
| direct baryonic inertia     | 0.12875     |
| compact H2 memory           | 39.565      |
| historical disk copy memory | 0.49331     |

FITS maps for those cases. The posterior QICT diagnostic tests the flexibility of the finite-correlation functional form; its status is diagnostic rather than pre-scored. The gas-only amplitude is appropriate when the supplied baryonic mass is gas-dominated. Stellar-dominated systems require the baryon-complete diagnostic and, for map-level status, two-dimensional H I data.

## 13 Reproducibility

The package includes raw submitted archives, source tables, figure data, analysis scripts, LaTeX sources, compiled PDFs, the combined manuscript-plus-supplement PDF, and SHA256 hashes. The command `make reproduce` regenerates the reported numerical products from the included files. The author received no funding for this work and declares no competing interests.

## References

- [1] Toomre, A. On the gravitational stability of a disk of stars. *Astrophysical Journal* **139**, 1217–1238 (1964).
- [2] Goldreich, P. and Lynden-Bell, D. I. Gravitational stability of uniformly rotating disks. *Monthly Notices of the Royal Astronomical Society* **130**, 97–124 (1965).
- [3] Binney, J. and Tremaine, S. *Galactic Dynamics*. Princeton University Press (2008).
- [4] Milgrom, M. A modification of Newtonian dynamics as an alternative to the hidden mass hypothesis. *Astrophysical Journal* **270**, 365–370 (1983).
- [5] Famaey, B. and McGaugh, S. S. Modified Newtonian Dynamics (MOND): observational phenomenology and relativistic extensions. *Living Reviews in Relativity* **15**, 10 (2012).
- [6] McGaugh, S. S., Lelli, F. and Schombert, J. M. The radial acceleration relation in rotationally supported galaxies. *Physical Review Letters* **117**, 201101 (2016).

Table 7: Milky Way Oort diagnostic from the QICT radial field.

| Quantity                                   | Value  |
|--------------------------------------------|--------|
| $R_0$ [kpc]                                | 8.15   |
| $V_c(R_0)$ [km s $^{-1}$ ]                 | 230.05 |
| $dV/dR _{R_0}$ [km s $^{-1}$ kpc $^{-1}$ ] | -0.84  |
| $A$ [km s $^{-1}$ kpc $^{-1}$ ]            | 14.53  |
| $B$ [km s $^{-1}$ kpc $^{-1}$ ]            | -13.70 |

Table 8: Ring-level stress-test summary.

| Statistic                                          | value  |
|----------------------------------------------------|--------|
| Retained galaxies                                  | 143    |
| Median $\ell_{\text{post}}/\ell_{25}^{\text{gas}}$ | 0.583  |
| MAD of $\ell_{\text{post}}/\ell_{25}^{\text{gas}}$ | 0.226  |
| Within factor 2                                    | 75/143 |
| Anchored QICT beats best halo                      | 27/143 |
| Posterior diagnostic beats best halo               | 64/143 |
| Median $\Delta\text{BIC}$ anchored vs best halo    | +12.37 |
